# Tracking the origin of island diversity: insights from divergence with the continental pool in monocots

Simon Veron<sup>1,2\*</sup>, Maud Mouchet<sup>2</sup>, Philippe Grandcolas<sup>1</sup>, Rafaël Govaerts<sup>3</sup>,  
Thomas Haebermans<sup>1</sup>, and Roseli Pellens<sup>1</sup>

<sup>1</sup>*Institut de Systématique Evolution et Biodiversité (ISYEB UMR7205), Muséum National d'histoire naturelle, CNRS, Sorbonne Université, EPHE, Université des Antilles, CP51, 47 rue Buffon, 75005, Paris, France*

<sup>2</sup>*Centre d'Ecologie et des Sciences de la Conservation (CESCO UMR7204) MNHN, CNRS, Sorbonne Université - CP51, 55-61 rue Buffon, 75005, Paris, France*

\* Author for correspondence (E-mail: [sveron@edu.mnhn.fr](mailto:sveron@edu.mnhn.fr); Tel.: +33 1 40 79 57 63; Fax: +33 1 40 79 38 35).

## 34 Abstract

35 At their early age, a large proportion of island pools were a partial sampling of mainland pools  
36 whatever islands are oceanic or fragments of the mainland. Through time, colonization,  
37 diversification, extinctions, have deeply transformed insular and continental communities and  
38 therefore the degree to which they share species. We studied the relative importance of these  
39 mechanisms by looking at the shared evolutionary history between species pools on islands and  
40 continents. Indeed, most of these mechanisms are not neutral regarding phylogeny but are  
41 linked to species evolutionary relationships. We measured the phylogenetic divergence between  
42 continental and insular monocot communities through metrics of beta Mean Pairwise Distance  
43 and beta Mean Nearest Taxon Distance. We first tested the influence of spatial and  
44 environmental distance to the continent, two main factors of divergence, but whose explanatory  
45 power in a phylogenetic context was still unclear. We showed that both dispersal and  
46 environmental filtering were important to explain divergence, although species that could pass  
47 these filters were not phylogenetically clustered. There was however a clear distinction between  
48 oceanic and continental islands: a stable climate in the latter was key to the survival of the  
49 original biota leading to a high proportion of shared lineages between the mainland and islands.  
50 But distance to the continent was only part of the story, we investigated additional mechanisms  
51 of phylogenetic divergence through their relation to island features and community structure.  
52 This showed that the most divergent islands occurred in the tropics and that processes of  
53 persistence of original species, diversification in remote archipelagos, neutral colonization on  
54 easy-to-reach islands, turnover, and high speciation rates may have driven phylogenetic  
55 divergence at a world scale. This study showed how phylogenetic approaches may explain how  
56 divergence, or similarity may have arisen and provide new insights in the continental origin of  
57 plant diversity on islands.

58

59 **Key words:** beta diversity, isolation, monocotyledon, phylogenetic divergence, world islands

60

61

62

63

64

## 65 Introduction

66  
67 One of the main questions concerning island ecology is the extent their floras and faunas  
68 resemble those from the continents assumed to be the main source of colonisers (Patiño et al.  
69 2017, Koenig et al. 2019). At an early stage, a large proportion of island communities are a  
70 partial sampling of mainland pools (Wallace 1880 but see Ali 2017). Continental islands  
71 already harbored a full complement of species when they separated from continents. Oceanic  
72 islands were depauperate of life at birth, and their species composition results mainly from  
73 colonization from continents. Through time, large scale factors such as geographical isolation,  
74 archipelago dynamics and island age, have shaped the arrival, settlement, diversification of  
75 species in the community. In addition, community assembly in islands may be influenced by  
76 other determinants such as habitat and resource availability that modulate population sizes or  
77 inter and intra specific interactions, driving selection, survival and speciation (Kreft et al.  
78 2008, Kier et al. 2009, Negoita et al. 2016). All these mechanisms have deeply transformed  
79 insular and continental communities and therefore the degree to which they share species.

80 The theory of island biogeography (MacArthur and Wilson 1967) and empirical studies  
81 (Weigelt and Kreft 2013, Patiño et al. 2015) predict that immigration rates decrease with  
82 spatial distance. This implies that the number of species shared by islands and continents  
83 decrease with the distance between them. However, colonization is highly dependent on the  
84 abilities of species to disperse, which may be lineage specific. Consequently, some closely-  
85 related species may co-occur on spatially distant continental areas and islands, whereas other  
86 lineages may be spatially clustered and totally absent from remote places. For example,  
87 Patiño et al. (2015) demonstrated that seed plants species-richness decreased with island  
88 isolation whereas this was not the case for plants that produce spores, allowing dispersal on  
89 relatively longer distances. This dispersal filter makes that the effect of spatial distance is  
90 driven by the phylogenetic position of the species, hence blurring the expected effect of

91 spatial distance on evolutionary history differences, *i.e.* phylogenetic divergence. Beyond  
92 spatial distance, environmental distance is another factor explaining why communities may  
93 share species or not (e.g. Nekola and White 1999, Tuomisto 2003, Carvajal-Endara et al.  
94 2017). Different environmental conditions between ecosystems may prevent the settlement of  
95 some species because they cannot form viable populations in the environment to which they  
96 disperse. Again, the diversified responses of species to different environmental conditions  
97 may strongly reflect their position of species in the Tree of Life. Closely related species are  
98 expected to share traits and to occupy more similar niches thus co-occurring at places with  
99 similar environmental conditions (Webb et al. 2002). Following this reasoning, environmental  
100 distance would be a strong filter for the co-occurrence of closely related lineages and may  
101 increase phylogenetic divergence between communities (Tuomisto 2003, but see Gerhold et  
102 al. 2015). This may however not always be true. For instance, species from distinct lineages  
103 where trait evolution is predominantly convergent, as sometimes found in islands (Gillespie  
104 2007), can co-occur in similar environments, even if they are over-dispersed in the phylogeny.  
105 On the contrary, very closely related species may adapt to highly diverging niches available to  
106 them when they arrive on an island (Evans et al. 2014). For all these reasons, the effect of  
107 spatial and environmental distance on phylogenetic divergence between islands and  
108 continents is still unclear (see Carvajal-Endara et al. 2017 for a regional example). A first  
109 objective of this study is thus to distinguish the contributions of spatial and environmental  
110 distance to phylogenetic divergence between insular and continental species pools.

111         However, spatial and environmental distances to the continent may only be part of the  
112 story explaining why species pools diverge between islands and continents and therefore why  
113 some islands are more divergent than others (Koenig et al. 2019). While we acknowledge that  
114 evolutionary and ecological dynamics in continents may have a role in explaining the  
115 phylogenetic divergence between islands and the mainland (Cronk 1992) here we focus on

116 processes occurring in islands. The presence or absence of lineages on islands depend on  
117 ecological and evolutionary changes, resulting from colonization, diversification, extinctions  
118 that have a strong phylogenetic signature (Gillespie 2007). The importance of these processes  
119 in shaping island diversity may therefore be estimated by looking at the phylogenetic structure  
120 of communities ( Weigelt et al. 2015, Carvajal-Endara et al. 2017). Nonetheless, analyses of  
121 community structure generally require the use of null models which, by randomizing species  
122 between pools, are largely dependent on the scale to which these pools are defined and make  
123 it difficult to detect the true community phylogenetic patterns (Graham and Fine 2008). Besides,  
124 as the insular pool mostly originate from mainland lineages, subjected to diversification or  
125 not, we assume here that additional processes could be revealed by looking at the  
126 phylogenetic divergence between insular and continental communities. Island-mainland  
127 comparison would be the “logical-way” to understand the evolution and assembly of the  
128 insular biota, but there are still very few studies which have taken this approach into  
129 consideration (Santos et al. 2016). Our second objective was thus to identify processes and  
130 estimate their contribution to the phylogenetic divergence between islands and continents. We  
131 assume that high divergence could be inferred from 1) long branches arising from  
132 relictualization or/and long-term survival of species in islands providing current and past  
133 refuge to plant species, 2) in situ speciation at the origin of evolutionary closely-related  
134 species in islands and of the share of deep tree branches between islands and continents, 3)  
135 low colonization events from the mainland so that only few branches would be shared, 4) high  
136 turnover leading to a high phylogenetic divergence both at the terminal and deep-branch level.  
137 To test these hypotheses we used measures of phylogenetic beta Mean Pairwise Distance  
138 ( $MPD_{\beta}$ ) - sensitive to variation at the deep branch level - and phylogenetic beta Mean Nearest  
139 Taxon Distance ( $MNTD_{\beta}$ ) - sensitive to variation at the terminal branch level - between  
140 insular and continental pools. Both of these indices of phylogenetic divergence were then

141 linked to the phylogenetic structure of the species pool on islands and to island biophysical  
142 features, as both display traces of past mechanisms at the origin of island diversity.

143 We focused on Monocotyledons which is a very large clade, morphologically and  
144 functionally diverse, representing a quarter of flowering plant diversity. Monocots are  
145 distributed all across the globe and are well represented on islands. This, along with the  
146 existence of a well-resolved phylogeny and with database built by experts makes that  
147 Monocotyledon is a well-suited group to study the origins of phylogenetic divergence  
148 between insular and continental communities.

## 149 Material and Methods

### 150 Data

#### 151 *Islands and Continents*

152 There is a wide diversity of islands types, but common properties are that they are isolated,  
153 well defined geographically and have well delimited boundaries. A total of 4,105 islands was  
154 used in this study. They were delimited with the Global Island Database provided by the  
155 United Nations Environment Programm (UNEP) (Depraetere and Dall 2007), and restricted  
156 to all isolated areas smaller than Australia occurring in oceans. Islands found within  
157 continental boundaries (e.g. in lakes, estuaries, rivers) were not considered. 610 continental  
158 areas were defined and delimited based on TDWG polygons at the 4<sup>th</sup> level (Brummitt et al.  
159 2001).

#### 160 *Phylogeny*

161 This study was based on a recent phylogeny of Monocots, which includes representatives of  
162 the great majority of genera (Tang et al. 2016). The use of four DNA regions (*rbcL*, *matK*, *ndhF*  
163 and nrITS DNA) allowed to place 1,816 genera on the phylogenetic tree. The 710 genera for

164 which genetic data were missing were included as polytomies within their respective clades  
165 using the most up-to-date taxonomy for each taxon (Tang et al. 2016).

166

### 167 *Plant occurrences*

168 Data on plant occurrences were obtained from the web platform of the Global Biodiversity  
169 Information Facility (GBIF). We downloaded all records, except fossil ones, and selected  
170 those intersecting the islands considered in this study. Then we used e-monocot database to *i.*  
171 control for synonyms and use only each species' accepted name *ii.* to exclude non-native  
172 species occurrences *iii.* to control for species range by comparing occurrences from the GBIF  
173 data with those from e-monocot. E-monocot is a global database on monocotyledons which  
174 compiles occurrences assigned by experts to TDWG polygons. In addition, because aquatic  
175 plants tend to be highly evolutionary distant from all other species and might influence our  
176 estimates of phylogenetic divergence, we excluded all species belonging to the families  
177 Alismataceae, Acoraceae, Aponogetonaceae, Juncaceae, Juncaginaceae, Mayacaceae,  
178 Pontederiaceae, Potamogetonaceae, Ruppiaceae, Scheuchzeriaceae, Zosteraceae,  
179 Posidoniaceae, Cymodoceaceae and Hydrocharitaceae.

180 The dataset resulting from these filters comprised 2,568,386 occurrences representing 16,213  
181 species and 1,562 genera in 4,105 islands, and 16,571,974 occurrences of 48,140 species from  
182 2,178 genera in 610 continental areas.

### 183 **Estimates of phylogenetic divergence between islands and surrounding continents**

#### 184 *Metrics*

185 The phylogenetic divergence between insular and continental floras was calculated with  
186 phylogenetic Mean Pairwise Distance (MPD<sub>β</sub>) and Mean Nearest Taxon Distance (MNTD<sub>β</sub>),

187 using the `comdist` function from R package `picante` (Kembel et al. 2010).  $MPD_{\beta}$  is the mean  
188 phylogenetic distance separating each pair of tips in two assemblages (here an insular and a  
189 continental pool).  $MPD_{\beta}$  estimates phylogenetic divergence in the global composition of  
190 islands and continents, and is sensitive to variation at the deep branch level (Webb et al. 2008)  
191 (Webb 2000).  $MNTD_{\beta}$  is the mean distance separating each tip in a site from its nearest  
192 relative occurring in another one and is sensitive to differences at the terminal branch level (  
193 Webb 2000, Webb et al. 2008). It is thus expected that these measures are complementary to  
194 the assessment of different processes conducting to the share of deep or short branches  
195 between islands and continents (e.g. an adaptative radiation following the settlement of a  
196 genera still present on the mainland will tend to decrease the number of shared short branches  
197 but will have a lesser influence on the number of shared deep branches).

#### 198 *Effect of spatial and environmental distance on phylogenetic divergence*

199 We calculated  $MPD_{\beta}$  and  $MNTD_{\beta}$  between each island and each of the 10 nearest continental  
200 polygons. While we cannot be certain that the continental polygons defined here represent the  
201 true species pool for each island, it is likely that lineages present on islands originate from  
202 multiple relatively close continental regions. For example, Carvajal-Endara et al. (2017)  
203 estimated that the Galapagos species could have dispersed from 9 continental countries.. To  
204 test the sensitivity of the results to the number of continental polygons, we also measured  
205  $MPD_{\beta}$  and  $MNTD_{\beta}$  between each island and each of the 5 and 20 nearest ones. We  
206 distinguished between oceanic and islands connected to the mainland during the Last Glacial  
207 Maximum – assumed to be a proxy for continental islands (Weigelt et al. 2013) – because  
208 different mechanisms may be at stake to explain divergence in each type of island (Whittaker  
209 and Fernández-Palacios 2007 but see Ali 2017).

210 As distance is assumed to be a main factor at differentiating biotas (53), we tested the  
211 predictive effect of spatial and environmental distances at explaining the variations in  $MPD_{\beta}$



212 and  $MNTD_{\beta}$  between insular and continental communities. Spatial distance was calculated in  
213 ArcGIS 10.3.1, as the distance between the centroids of an island and of a continental  
214 polygon. We then used four variables from (Fick and Hijmans 2017) reflecting distances in  
215 climatic conditions: differences in mean annual temperature, mean annual rainfall, mean  
216 annual solar radiation, mean annual wind speed. We did not include the differences of latitude  
217 and longitude due to colinearity with environmental variables, especially solar radiation and  
218 temperature, but their effect was tested separately (Appendix S1). All variables (e.g.  
219 difference in mean annual temperature) were then scaled and we estimated the average  
220 environmental distance as the euclidean distance among scaled variables (Tuomisto 2003).  
221 Finally, to account for other environmental dimensions not examined, we tested the effect of  
222 the number of different ecoregions between islands and continents (Olson et al. 2001) .

223 We first used Generalized Linear Mixed Models (GLMM) to test the effect of spatial and  
224 environmental distances on  $MPD_{\beta}$  and  $MNTD_{\beta}$  between each island and a polygon in the  
225 continent. Second, we employed Boosted Regression Trees (BRT) (Elith et al. 2008) in order to  
226 make an informed decision about the relative contribution of each variable to phylogenetic  
227 divergence. BRT also displayed the direction of the relationship between the response and the  
228 predictors and we looked for interactions with the highest contribution (Elith et al. 2008).

229 GLMM first tested the additive effects of all selected variables. We then used a second model  
230 in which all variables plus interaction between variables, identified thanks to the BRT  
231 method, were included. In GLMM, island's identity was held as a random variable. Yet when  
232 BRT and GLMM methods led to contradictory results for a given variable, for example  
233 because of residual colinearity, we performed additional models, one for each technic, in  
234 which the variable in question was tested alone. Especially, this correction was needed to test  
235 the effect of euclidean environmental distance.

236 **Characterisation of the minimum divergence between islands and continents**

237 To determine the divergence of each island with the most similar surrounding continental area  
238 and to further explore how minimum divergence was distributed across the world we  
239 estimated its minimum  $MPD_{\beta}$  and  $MNTD_{\beta}$  values ( $minMPD_{\beta}$  and  $minMNTD_{\beta}$ , respectively).  
240 We measured  $minMPD_{\beta}$  and  $minMNTD_{\beta}$  as the minimum values of divergence between an  
241 island and each of its 10 nearest continental polygons. Although insular species may have  
242 settled from multiple continental pools, we could not estimate the true original pool at the  
243 large scale we of our study, and we assumed that the minimum phylogenetic divergence from  
244 any continental polygon allowed to compare islands between them and to study the processes  
245 conducting to divergence between insular and continental pools.

#### 246 *Phylogenetic structure of insular communities*

247 In order to explore how the phylogenetic structure of an insular community may influence  
248  $minMPD_{\beta}$  and  $minMNTD_{\beta}$ , we calculated 7 related attributes for each island: variance in  
249 pairwise diversity (VPD), mean pairwise distance ( $MPD_{\alpha}$ ), the average and standard deviation  
250 in evolutionary distinctiveness (fair proportion index; ED), the proportion and the number of  
251 genera among the 10% of the most evolutionary distinct plants, and finally the number of  
252 genera in each island. Variance in pairwise diversity measures the regularity of the  
253 distribution of evolutionary history (Davies and Buckley 2012, Tucker et al. 2017). Evolutionary  
254 distinctiveness quantifies the number of relatives a species has and how phylogenetically  
255 distant they are (Faith 1992, Forest et al. 2007).  $MPD_{\alpha}$  is the pairwise phylogenetic distance  
256 between the species of a given community (Webb 2000).

#### 257 *Abiotic correlates of phylogenetic divergence*

258 Finally, we investigated which geographical, environmental, and historic factors, as well as  
259 sampling effort in islands may influence the minimum phylogenetic divergence with  
260 continents (Table 4). Note that these factors are intrinsic to an island, and that we did not use

261 the difference in environmental condition between an island and the surrounding continents as  
262 in the previous section. We selected variables which had low colinearity with all others (Table  
263 4), i.e. excluding variables with  $p > 0.5$  (Pearson correlation test). Latitude, likely to be an  
264 important factor of divergence representing a strong spatial effect, was tested independently  
265 due to its high colinearity with mean annual temperature. In addition, as our results may be  
266 biased by the fact that some islands were much less sampled than others, we re-ran the  
267 analysis without islands with low Incidence-based Coverage Estimate (ICE) values. ICE is  
268 calculated from the number of rare species in a sample and from species accumulation curves  
269 We calculated ICE by defining a sub-sample within an island as a set of observations obtained  
270 at a given date, and using the R function `spp.est` from the ‘Fossil’ package (Vavrek 2011). We  
271 then calculated the ICER index as the ratio of the observed number of species in an area over  
272 the expected number of species estimated with ICE. The contribution and significance of  
273 distance, phylogenetic structure and abiotic factors was thus tested with a dataset by  
274 successively excluding islands with ICER values lower than 0.2, 0.5 and 0.75. We found that  
275 results were not affected when these islands were discarded.

276

277 *Modeling the influence of island community structure and abiotic factors on phylogenetic*  
278 *divergence*

279 Using BRT and Generalized Linear Models (GLMs) we estimated the contribution and  
280 significance, respectively, of community structure and abiotic factors to  $\text{minMPD}_\beta$  and  
281  $\text{minMNTD}_\beta$ . No random variable was added in the models. Thanks to BRT we also estimated  
282 the strengths of interactions. The significance of the 2 interactions with the highest  
283 contributions were also tested with GLMs.

284 Exploring the relationship between abiotic features and community structure was not the main  
285 aim of this paper and was documented in previous studies (Weigelt et al. 2015, Carvajal-Endara  
286 et al. 2017), therefore the outcomes of this analyses is given as a supplementary material  
287 (Appendix S2).

## 288 Results

289 *How spatial and environmental distance influence phylogenetic divergence between insular*  
290 *and continental communities*

291 As estimated from boosted regression trees (BRT), variables with the highest importance at  
292 explaining phylogenetic beta mean pairwise distance ( $MPD_{\beta}$ ) were difference in solar  
293 radiation and difference in spatial distance (Table 2, Appendix S3). Difference in rainfall also  
294 had a high contribution in the case of oceanic islands. When accounting for island identity as  
295 a random effect in generalized linear mixed models (GLMMs),  $MPD_{\beta}$  significantly increased  
296 with spatial distance and rainfall, regardless if islands were continental or oceanic.

297 Differences in solar radiation and temperature had an unexpected negative relationship with  
298  $MPD_{\beta}$ , probably reflecting their non-linear relationships with the difference in latitude in the  
299 tropics (Appendix S1). Indeed, when tropical islands were excluded, the effect of these two  
300 variables had a significant positive relationship with  $MPD_{\beta}$ . The remaining variables (wind  
301 speed, number of ecoregions and Euclidean environmental distance) had lower contributions  
302 but significant positive relationship with  $MPD_{\beta}$  (Table 2 ; Appendix S3). Looking at  $MNTD_{\beta}$ ,  
303 variables which generally had a high contribution were the difference in annual solar  
304 radiation, spatial distance and the euclidean environmental distance. However, contribution of  
305 spatial distance was much lower in continental islands (Table 2, Appendix S3). When island  
306 identity was integrated as a random effect in GLMMs all variables had a positive relationship

307 with  $\text{MNTD}_\beta$ . Overall, the choice of number of continental polygons used to measure  
308 divergence did not change the major results.

### 309 *Spatial patterns of island-continent divergence*

310 Islands with floras highly divergent from continents when using  $\text{minMPD}_\beta$  were found  
311 worldwide, even though  $\text{minMPD}_\beta$  values tended to be the highest around the equator (figure  
312 2a). Madagascar, Fiji, Indonesia and West Indies are examples of islands with high  $\text{minMPD}_\beta$   
313 (figure 2a, Appendix S4).

314 Spatial patterns of  $\text{minMNTD}_\beta$  roughly differed from those of  $\text{minMPD}_\beta$ . Especially, there  
315 were relatively more islands with high  $\text{minMNTD}_\beta$  in the Southern hemisphere. Yet, when  
316 looking at extreme values, islands with the highest  $\text{minMNTD}_\beta$  were similar to those having  
317 the highest values  $\text{minMPD}_\beta$ . Examples are Madagascar, Fiji, Indonesia, Cook Islands and  
318 American Samoa (figure 2b, Appendix S4).

### 319 *Effect of phylogenetic structure on phylogenetic divergence between island and continents*

320 We found that the effect of insular community structure varied depending on whether  
321  $\text{minMNTD}_\beta$  or  $\text{minMPD}_\beta$  was used. The average Evolutionary Distinctiveness (ED) of insular  
322 monocots had the highest contribution and a significant positive effect on  $\text{minMPD}_\beta$  (table 3).  
323 On the contrary, standard deviation in ED had a significant negative effect.  $\text{MPD}_\alpha$  and genus  
324 richness ranked second and fifth regarding their contribution to  $\text{minMPD}_\beta$  (contributions equal  
325 to 31.8% and 2.1%, respectively). Both variables displayed a significant positive relationship  
326 with  $\text{minMPD}_\beta$ . The highest contribution to  $\text{minMNTD}_\beta$  was the number of insular genera  
327 (contribution = 42.3%), which had a significant negative effect. Other variables with a  
328 relatively high contribution were VPD (contribution=30.6%) and  $\text{MPD}_\alpha$   
329 (contribution=15.04%), both having a significant negative relationship with  $\text{minMNTD}_\beta$ .

### 330 *Abiotic correlates of phylogenetic divergence*

331 Latitude was the variable with highest contribution to explain  $\text{minMPD}_\beta$  and its effect was  
332 significantly negative. Interaction of latitude and longitude also had a significant negative  
333 effect: effect of low latitude on phylogenetic divergence between islands and continents was  
334 stonger at high longitude. Other geographic variables had a low contribution to  $\text{minMPD}_\beta$   
335 such as the distance to the nearest continental polygon and area which had slightly significant  
336 positive and negative relationships, respectively. Climatic variables generally had a moderate  
337 contribution to  $\text{minMPD}_\beta$ . Specifically mean annual rainfall and temperature had the highest  
338 contributions among all abiotic variables (Table 4a). Climatic variables all had a significant  
339 effect on  $\text{minMPD}_\beta$ . It was positive for mean annual temperature, mean annual rainfall and  
340 the number of ecosystems, but negative regarding rainfall seasonality, annual wind speed, and  
341 standard deviation in vapour pressure. Although historical factors had a relatively low  
342 contribution to  $\text{MPD}_\beta$ , we found a significant positive effect of the velocity of past climate  
343 change and of the past connexion to the mainland.

344 Regarding  $\text{minMNTD}_\beta$  between islands and continents, latitude (contribution=31.1%), the  
345 Relative Incidence-based Coverage Estimator ( $\text{ICE}_r$ ; contribution=26.7%) and longitude  
346 (contribution=9.7%) were important to explain  $\text{minMNTD}_\beta$ , with a significant negative effect  
347 (Table 4b).  $\text{ICE}_r$  displayed a significant negative interaction with area, meaning that poorly  
348 sampled and small islands had the highest  $\text{minMNTD}_\beta$  values. Contribution of environmental  
349 variables was low. Among them, mean annual temperature (contribution=4.3%; significant  
350 positive effect) and standard deviation in vapour pressure (contribution=7.0%; significant  
351 negative effect) had the highest importance. As for historical variables, velocity of past  
352 climate change had a significant positive relationship on  $\text{minMNTD}_\beta$ , whereas past  
353 connection to the mainland, contrary to what was observed for  $\text{minMPD}_\beta$ , had a significant  
354 negative effect (Table 4b, Fig S2).

355

## 356 Discussion

357 Difference in species composition between islands and continents has already been well-  
358 documented. This study goes one step further by showing that insular and continental pools  
359 also differ in their evolutionary history and that the degree to which they share phylogenetic  
360 branches depend on the phylogenetic signature of the processes shaping diversity.

### 361 *a. Divergence due to spatial and environmental distance*

362 While effect of the distance to the continent is recognised to be a main driver of species  
363 richness and community composition in islands (MacArthur and Wilson 1967, Brown and  
364 Kodric-Brown 1977, Rosindell and Phillimore 2011, Cabral et al. 2014), the present study gives  
365 evidence that it is also true at the phylogenetic level. This result was expected because a  
366 difference in species composition also means that the phylogenetic branches supporting these  
367 species are distinct between pools. As spatial distance acts as a dispersal filter reducing the  
368 number of individuals exchanged between continents and islands, it also reduces the number  
369 of shared phylogenetic branches between them. More specifically, our results suggest that  
370 among the insular species and phylogenetic branches originating from the mainland, most of  
371 them are or were present on the nearest continents. One of the main benefits of using  
372 phylogenetic approaches is that it allows investigating the mechanisms of dispersal filtering  
373 that have a strong phylogenetic signature. For instance, some studies show that dispersal  
374 toward some islands is lineage specific due to phylogenetically clustered traits such as seed  
375 size. However, we found that distance had a similar influence on the co-occurrence of deep or  
376 terminal branches indicating that a dispersal filter towards species clustered in the phylogeny  
377 is not detected at a global scale.

378 Distance to the continent is only the first filter of species settlement, although some  
379 individuals may reach an island, only a few species may truly establish themselves due to  
380 specific niche requirements. Several studies showed the prevalence of environmental over  
381 dispersal filtering (Tuomisto 2003, Carvajal-Endara et al. 2017). However, at a global scale it was

382 unclear which of those filters had the strongest influence on the divergence between islands  
383 and continents. Strong environmental filtering is expected to generate species phylogenetic  
384 clustering due to phylogenetic trait conservatism (Webb et al. 2002). Despite the fact that  
385 distinct environmental conditions reduce the number of shared branches between islands and  
386 continents, the genera they supported were likely not clustered the phylogeny (Table 1).

387         In the case of continental islands, increased divergence with environmental distance  
388 may result from two complementary factors. On the one hand, lineages that were present at  
389 the island birth and that persist nowadays may have survived thanks to the continuity of a  
390 stable island climate through time ( Sandel et al. 2011, Weigelt and Kreft 2013). On the  
391 opposite, we showed that high velocity of past climate change result in high phylogenetic  
392 divergence between continents and islands.

393         This, with the complex geological history following the breakup of continental islands, the  
394 presence of a complete set of species at birth and more frequent arrivals may also explain the  
395 lesser importance of spatial distance on divergence when compared to oceanic islands.

396



397

398 *b. How island features and community structure drive phylogenetic divergence*

399 Distance is a key determinant of species arrival and establishment on islands but further  
400 ecological and evolutionary processes are at the origin of divergence between islands and  
401 continents. The study of phylogenetic divergence may allow distinguishing several of them.  
402 Geological and climatic history of islands drive the long-term survival of species promoting  
403 their evolutionary distinctiveness (ED). The monocotyledons with highest ED values, usually  
404 hold long branches and have few close relatives. So, ED results either from ancient speciation  
405 events that gave rise to a single of few species, or from the evolutionary isolation of a species  
406 through the extinction of its nearest-relatives, i.e. relictualization (Gillespie 2007, Grandcolas  
407 and Trewick 2016). We found that the more evolutionary distinct the monocotyledon on an  
408 island the more divergent from continental pools they were, but that ED had a lower  
409 contribution on the divergence of the most closely-related taxa rather than on the divergence  
410 between all taxa. This is likely explained because many lineages with high ED may still be  
411 present on the continent (Jetz et al. 2014). Indeed, when high ED monocotyledons are present  
412 on both continents and islands, the phylogenetic distance may remain high with all other taxa,  
413 but may be lower when it is estimated only from the most closely-related taxa. The present  
414 results thus indicate that relictualization is likely to have been less frequent than evolutionary  
415 processes in explaining the origin of ED monocotyledons. Besides, we also observed that  
416 islands where mean ED is high were generally connected to the continent in the past. Insular  
417 monocotyledons which are currently evolutionary distinct may have therefore probably  
418 appeared on the mainland before islands became fragmented.

419 Phylogenetic divergence is not only due to ancient and isolated lineages, but also to  
420 recent and clustered taxa absent on the mainland. Our results show that when phylogenetic  
421 distance of the insular pool is low and regular, island and mainland flora highly diverge. At

422 the generic level, this may correspond to islands where environmental, dispersal, or biotic  
423 filters have allowed a majority of closely related monocot lineages to establish (Cadotte and  
424 Tucker 2017, Koenig et al. 2019). However, as we did not find an effect of environmental  
425 distance or spatial distance on the occurrence of closely-related genera on islands, additional  
426 factors potentially causing such clustered phylogenetic structure should be investigated. At  
427 the species level it may be expected that regular and low phylogenetic distance may cause  
428 high phylogenetic divergence due to evolutionary radiations. Recent species radiations may  
429 form clusters of endemic species with regular and low phylogenetic distance, conducting to  
430 few terminal branches shared with the mainland. Such radiations are more likely to occur on  
431 remote oceanic islands. Indeed, in these islands, immigration followed by in-situ speciation is  
432 the main process at the origin of species diversity: colonization rate is so slow that the main  
433 processes to fill the niche space are evolution or adaptation (Gillespie 2007, Emerson and  
434 Gillespie 2008).

435 Besides diversification and extinction, colonization is likely to be another important  
436 cause of phylogenetic divergence. Colonization from the continent may increase the co-  
437 occurrence of similar lineages between islands and continents. We found that three factors  
438 related to high colonization rates increase phylogenetic similarity between island and  
439 continental pools, confirming our results about the effect of dispersal filtering: small spatial  
440 distance from the continent, large proportion of surrounding land mass and high wind speed.  
441 Proximity to the continent, and more generally to any other land mass, facilitates exchanges  
442 and thus high phylogenetic similarity at both the terminal and the deep branch levels  
443 (MacArthur and Wilson 1967). It probably means that genera having established on these  
444 islands are neither over-dispersed nor clustered in the phylogeny. Regarding wind speed, its  
445 negative relationship with divergence highlights that monocot dispersal capacities may have a  
446 critical role to explain colonization success. The importance of wind speed to divergence

447 tends to be stronger at deep than at terminal branch level. Genera whose representatives can  
448 disperse through anemochory may consequently tend to be over-dispersed in the phylogeny  
449 but functional trait analyses are needed to test this assumption. Plants may also have reached  
450 islands thanks to animals, ocean currents, or human conveyance. To understand how this  
451 mode of dispersal influences which lineages co-occur on islands and continents, future  
452 research may look at the dispersal traits of lineages having colonized islands and at the  
453 directionality and trajectories of dispersal factors (Patiño et al. 2015, Gillespie et al. 2012).

454 Other key factors of divergence between islands and continents are species turnover and  
455 speciation rates. Islands with high temperature and intense but relatively regular  
456 precipitations, i.e. islands with a tropical rainforest climate, were more likely to harbor a flora  
457 that diverges from the mainland flora. Rainfall and temperature, but also vapour pressure, are  
458 related to water and energy supply, which may increase turnover but also speciation rates,  
459 conducting to divergent communities from the mainland (Hawkins et al. 2003, Beres et al. 2008).  
460 While speciation are more frequent at the species level, it also occurred in monocots at the  
461 generic level, especially in the tropics. This divergence was important to both deep and short  
462 branches, which suggests that turnover is not clustered in the phylogeny. High energy and  
463 water supply is common in the tropics and around the equator, but these are also places where  
464 many processes departing from current environment, such as evolutionary, climatic and  
465 geologic history, have let a strong imprint on species diversity and divergence. Mechanisms at  
466 the origin of this latitudinal gradient in species diversity still fuels the debate and  
467 consequences in terms of divergence between species pools remain to be investigated.

468 Finally, not only current but also past environmental conditions are important to explain  
469 phylogenetic divergence, in particular on continental islands. Velocity of past climate change  
470 may actually be associated to low environmental stability (Fjeldsä 1994) and past species

471 extinctions of insular species (Sandel et al. 2011) but also to strong environmental filtering  
472 conducting to dissimilar flora between continents and islands

473 *Directions for future research*

474 Although we reduced biases in occurrence data through different methods, working at a  
475 global scale implied that the dataset can be subject to sampling biases over all islands, due to  
476 varying priorities along data acquisition history. Especially, more intense sampling in some  
477 less studied islands, but also the mobilisation of yet non-digitized herbarium data will  
478 certainly lead to higher robustness of the results obtained here. In addition, although the use of  
479 the generic level and of presence only data have been important in reducing biases in monocot  
480 spatial distribution, this may have prevented from detecting the importance of some  
481 mechanisms on divergence, for example adaptative radiations.

482 A second point that may stimulate further research is that we have only been interested in  
483 abiotic factors to explain divergence between insular and continental flora. Biotic factors,  
484 especially competition and interactions conducting to co-evolution, may act as a biotic filter,  
485 shape the phylogenetic structure of communities and their divergence with the mainland (  
486 Wilson 1969, Webb et al. 2002, Gillespie 2007, Weigelt et al. 2015). We therefore encourage to  
487 direct future research on the role of biotic factors in shaping the phylogenetic structure of  
488 communities and how they may explain divergence between insular and continental pools.  
489 Moreover, at considering the distance from each island to the nearest continent we ignored  
490 potential dispersion between islands and especially the role of island-hopping which may be  
491 an important process in the composition of insular communities (Sillero et al. 2018). Insular  
492 species diversity has also a strong temporal dimension: age reflects time for speciation and  
493 colonization (Emerson and Gillespie 2008), area but also past distance to the continent varied  
494 through geological times (Norder et al. 2018) and are expected to have a strong influence on  
495 patterns of beta diversity. In addition the biological classification in a simple dichotomy, i.e.

496 oceanic versus continental islands, may be complemented by introducing other island types  
497 (Ali 2017).

498

499 **Conclusion: new insights on plant community divergence between island and continents**  
500 **thanks to phylogenetic approaches**

501 Phylogenetic approaches were rarely employed to understand patterns and origin of plant  
502 diversity in islands (Kreft and Jetz 2007, Kreft et al. 2008, Kier et al. 2009, but see Weigelt et al.  
503 2015). Here, using approaches based on phylogenetic divergence, we provided new insights  
504 on the continental origin of plant diversity in islands. At a global scale spatial and  
505 environmental distance act as filters to species establishment on islands although they are not  
506 directed toward specific lineages. On continental islands, an unchanged climate may have  
507 allowed species to persist following the isolation process. We then investigated the  
508 importance of island features and phylogenetic structure in explaining deep or short branches  
509 shared by islands and the mainland. This showed that reasons for phylogenetic divergence  
510 were *i.* the persistence of evolutionary original species *ii.* regular and low phylogenetic  
511 distance among species caused by - for example - speciation in remote archipelagos *iii.*  
512 colonization of non-clustered taxa *iv.* high turnover and speciation rates. We further  
513 encourage future use of phylogenetic approaches in island biogeography, for example to  
514 disentangle the role of age or of biotic factors on patterns of island diversity.

515

## 516 **References**

- 517 Ali, J. R. 2017. Islands as biological substrates: classification of the biological assemblage components  
518 and the physical island types. - J. Biogeogr. 44: 984–994.
- 519 Beres, K. A. et al. 2008. Rotifers and Hubbell’s unified neutral theory of biodiversity and  
520 biogeography. - Nat. Resour. Model. 18: 363–376.

- 521 Brown, J. H. and Kodric-Brown, A. 1977. Turnover Rates in Insular Biogeography: Effect of  
522 Immigration on Extinction. - *Ecology* 58: 445–449.
- 523 Brummitt, R. et al. 2001. World geographical scheme for recording plant distributions.
- 524 Cabral, J. S. et al. 2014. Biogeographic, climatic and spatial drivers differentially affect  $\alpha$ ,  $\beta$  and  $\gamma$   
525 diversities on oceanic archipelagos. - *Proc. R. Soc. B Biol. Sci.* 281: 20133246–20133246.
- 526 Cadotte, M. W. and Tucker, C. M. 2017. Should Environmental Filtering be Abandoned? - *Trends Ecol.*  
527 *Evol.* 32: 429–437.
- 528 Carvajal-Endara, S. et al. 2017. Habitat filtering not dispersal limitation shapes oceanic island floras:  
529 species assembly of the Galápagos archipelago. - *Ecol. Lett.* 20: 495–504.
- 530 Cronk, Q. C. B. 1992. Relict floras of Atlantic islands: patterns assessed. - *Biol. J. Linn. Soc.* 46: 91–103.
- 531 Davies, T. J. and Buckley, L. B. 2012. Exploring the phylogenetic history of mammal species richness: A  
532 phylogenetic history of mammal richness. - *Glob. Ecol. Biogeogr.* 21: 1096–1105.
- 533 Depraetere, C. and Dall, A. 2007. IBPoW Database. A technical note on a global dataset of islands.:  
534 58.
- 535 Elith, J. et al. 2008. A working guide to boosted regression trees. - *J. Anim. Ecol.* 77: 802–813.
- 536 Emerson, B. C. and Gillespie, R. G. 2008. Phylogenetic analysis of community assembly and structure  
537 over space and time. - *Trends Ecol. Evol.* 23: 619–630.
- 538 Evans, M. et al. 2014. Insights on the Evolution of Plant Succulence from a Remarkable Radiation in  
539 Madagascar (Euphorbia). - *Syst. Biol.* 63: 697–711.
- 540 Faith, D. P. 1992. Conservation evaluation and phylogenetic diversity. - *Biol. Conserv.* 61: 1–10.
- 541 Fick, S. E. and Hijmans, R. J. 2017. WorldClim 2: new 1-km spatial resolution climate surfaces for  
542 global land areas: new climate surfaces for global land areas. - *Int. J. Climatol.* 37: 4302–4315.
- 543 Forest, F. et al. 2007. Preserving the evolutionary potential of floras in biodiversity hotspots. - *Nature*  
544 445: 757–760.
- 545 Gerhold, P. et al. 2015. Phylogenetic patterns are not proxies of community assembly mechanisms  
546 (they are far better). - *Funct. Ecol.* 29: 600–614.
- 547 Gillespie, R. G. 2007. Oceanic islands: models of diversity. - *Encycl. Biodivers.*: 1–13.
- 548 Gillespie, R. G. et al. 2012. Long-distance dispersal: a framework for hypothesis testing. - *Trends Ecol.*  
549 *Evol.* 27: 47–56.
- 550 Graham, C. H. and Fine, P. V. A. 2008. Phylogenetic beta diversity: linking ecological and evolutionary  
551 processes across space in time. - *Ecol. Lett.* 11: 1265–1277.
- 552 Grandcolas, P. and Trewick, S. A. 2016. What Is the Meaning of Extreme Phylogenetic Diversity? The  
553 Case of Phylogenetic Relict Species. - In: Pellens, R. and Grandcolas, P. (eds), *Biodiversity*  
554 *Conservation and Phylogenetic Systematics: Preserving our evolutionary heritage in an*  
555 *extinction crisis.* Springer International Publishing, pp. 99–115.

- 556 Hawkins, B. A. et al. 2003. Energy, water, and broad-scale geographic patterns of species richness. -  
557 Ecology 84: 3105–3117.
- 558 Jetz, W. et al. 2014. Global Distribution and Conservation of Evolutionary Distinctness in Birds. - Curr.  
559 Biol. 24: 919–930.
- 560 Kembel, S. W. et al. 2010. Picante: R tools for integrating phylogenies and ecology. - Bioinformatics  
561 26: 1463–1464.
- 562 Kier, G. et al. 2009. A global assessment of endemism and species richness across island and  
563 mainland regions. - Proc. Natl. Acad. Sci. 106: 9322–9327.
- 564 Koenig, C. et al. 2019. Disharmony of the world’s island floras: Supporting Information. - bioRxiv in  
565 press.
- 566 Kreft, H. and Jetz, W. 2007. Global patterns and determinants of vascular plant diversity. - Proc. Natl.  
567 Acad. Sci. 104: 5925–5930.
- 568 Kreft, H. et al. 2008. Global diversity of island floras from a macroecological perspective. - Ecol. Lett.  
569 11: 116–127.
- 570 MacArthur, R. H. and Wilson, E. O. 1967. The theory of island biogeography. - Princeton, NJ:  
571 Princeton University Press.
- 572 Negoita, L. et al. 2016. Isolation-driven functional assembly of plant communities on islands. -  
573 Ecography 39: 1066–1077.
- 574 Nekola, J. C. and White, P. S. 1999. The distance decay of similarity in biogeography and ecology. - J.  
575 Biogeogr. 26: 867–878.
- 576 Norder, S. J. et al. 2018. A global spatially explicit database of changes in island palaeo-area and  
577 archipelago configuration during the late Quaternary. - Glob. Ecol. Biogeogr. 27: 500–505.
- 578 Olson, D. M. et al. 2001. Terrestrial Ecoregions of the World: A New Map of Life on Earth. -  
579 BioScience 51: 933.
- 580 Patiño, J. et al. 2015. Island floras are not necessarily more species poor than continental ones. - J.  
581 Biogeogr. 42: 8–10.
- 582 Patiño, J. et al. 2017. A roadmap for island biology: 50 fundamental questions after 50 years of *The*  
583 *Theory of Island Biogeography*. - J. Biogeogr. 44: 963–983.
- 584 Rosindell, J. and Phillimore, A. B. 2011. A unified model of island biogeography sheds light on the  
585 zone of radiation: A unified model of island biogeography. - Ecol. Lett. 14: 552–560.
- 586 Sandel, B. et al. 2011. The Influence of Late Quaternary Climate-Change Velocity on Species  
587 Endemism. - Science 334: 660–664.
- 588 Santos, A. M. C. et al. 2016. New directions in island biogeography: New directions in island  
589 biogeography. - Glob. Ecol. Biogeogr. 25: 751–768.
- 590 Sillero, N. et al. 2018. Analysing the importance of stepping-stone islands in maintaining structural  
591 connectivity and endemism. - Biol. J. Linn. Soc. 124: 113–125.

- 592 Steinbauer, M. J. et al. 2016. Biogeographic ranges do not support niche theory in radiating Canary  
593 Island plant clades: Niche theory in radiating Canary Island plant clades. - *Glob. Ecol.*  
594 *Biogeogr.* 25: 792–804.
- 595 Tang, C. Q. et al. 2016. Global monocot diversification: geography explains variation in species  
596 richness better than environment or biology. - *Bot. J. Linn. Soc.* in press.
- 597 Tucker, C. M. et al. 2017. A guide to phylogenetic metrics for conservation, community ecology and  
598 macroecology: A guide to phylogenetic metrics for ecology. - *Biol. Rev.* 92: 698–715.
- 599 Tuomisto, H. 2003. Dispersal, Environment, and Floristic Variation of Western Amazonian Forests. -  
600 *Science* 299: 241–244.
- 601 Vavrek, M. J. 2011. Fossil: palaeoecological and palaeogeographical analysis tools. - *Palaeontol.*  
602 *Electron.*
- 603 Wallace, A. R. 1880. *Island life.*
- 604 Webb, C. O. 2000. Exploring the Phylogenetic Structure of Ecological Communities: An Example for  
605 Rain Forest Trees. - *Am. Nat.* 156: 145–155.
- 606 Webb, C. O. et al. 2002. Phylogenies and Community Ecology. - *Annu. Rev. Ecol. Syst.* 33: 475–505.
- 607 Webb, C. O. et al. 2008. Phylocom: software for the analysis of phylogenetic community structure  
608 and trait evolution. - *Bioinformatics* 24: 2098–2100.
- 609 Weigelt, P. and Kreft, H. 2013. Quantifying island isolation - insights from global patterns of insular  
610 plant species richness. - *Ecography* 36: 417–429.
- 611 Weigelt, P. et al. 2013. Bioclimatic and physical characterization of the world's islands. - *Proc. Natl.*  
612 *Acad. Sci.* 110: 15307–15312.
- 613 Weigelt, P. et al. 2015. Global patterns and drivers of phylogenetic structure in island floras. - *Sci.*  
614 *Rep.* in press.
- 615 Whittaker, R. J. and Fernández-Palacios, J. M. 2007. *Island biogeography: ecology, evolution, and*  
616 *conservation.*
- 617 Wilson, E. O. 1969. The species equilibrium. - In: *Diversity and Stability in Ecological Systems.* Systems  
618 Brookhaven National Laboratory Upton. Brookhaven Symposia in Biology.

619

620

## 621 Figure legends

622 **Figure 1.** Methodological procedure



623 **Figure 2.** Spatial distribution of the minimum phylogenetic divergence between islands and  
624 the 10 nearest continental areas for a) Mean Pairwise Distance b) Mean Nearest Taxon  
625 Distance.

## 626 Table legends

627 **Table 1.** The 15 abiotic variables tested and sources of data

628 **Table 2.** Effects of spatial and environmental distance on  $MPD_{\beta}$  and  $MNTD_{\beta}$  between islands  
629 and continents measured from BRT and GLM: “\*\*\*\*” indicate  $Pr(>z) < 0.0001$ ; “\*\*\*” indicate  
630  $Pr(>z) < 0.001$ ; “\*\*” indicate  $Pr(>z) < 0.01$  “.” indicate  $Pr(>z) < 0.1$ ; + and – indicate the  
631 direction of the relationship that is positive or negative, respectively. Column A presents the  
632 observed results. Column B and C represents data used as a sensitivity analysis.

633 **Table 3.** Contribution, direction and significance of variables of phylogenetic structure to a)  
634 minimum  $MPD_{\beta}$  and b) minimum  $MNTD_{\beta}$  between islands and continents.

635 **Table 4:** Contribution, direction and significance of abiotic variables to a) minimum  $MPD_{\beta}$   
636 between islands and continents and b) minimum  $MNTD_{\beta}$  between islands and continents.

## 637 Appendix legends

638 **Appendix S1.** Analysis of the relationship between solar radiation, latitude and phylogenetic  
639 divergence

640 **Appendix S2.** Effect of island features on phylogenetic structure of insular pools

641 **Appendix S3.** Boosted Regression Tree contributions of spatial and environmental distance to  
642 phylogenetic divergence

## 643 Data

644 Data will be made available on the Dryad repository

## 645 Declarations

646 Funding – This study has been supported by the French State through the Research National  
647 Agency under the LabEx ANR-10-LABX-0003-BCDiv, within the framework of the program  
648 ‘Investing for the future’ (ANR-11-IDEX-0004-02).

649  
650 Author contributions – The first author is the major contributor to this study. The last co-  
651 author is the leading co-author of this work

652



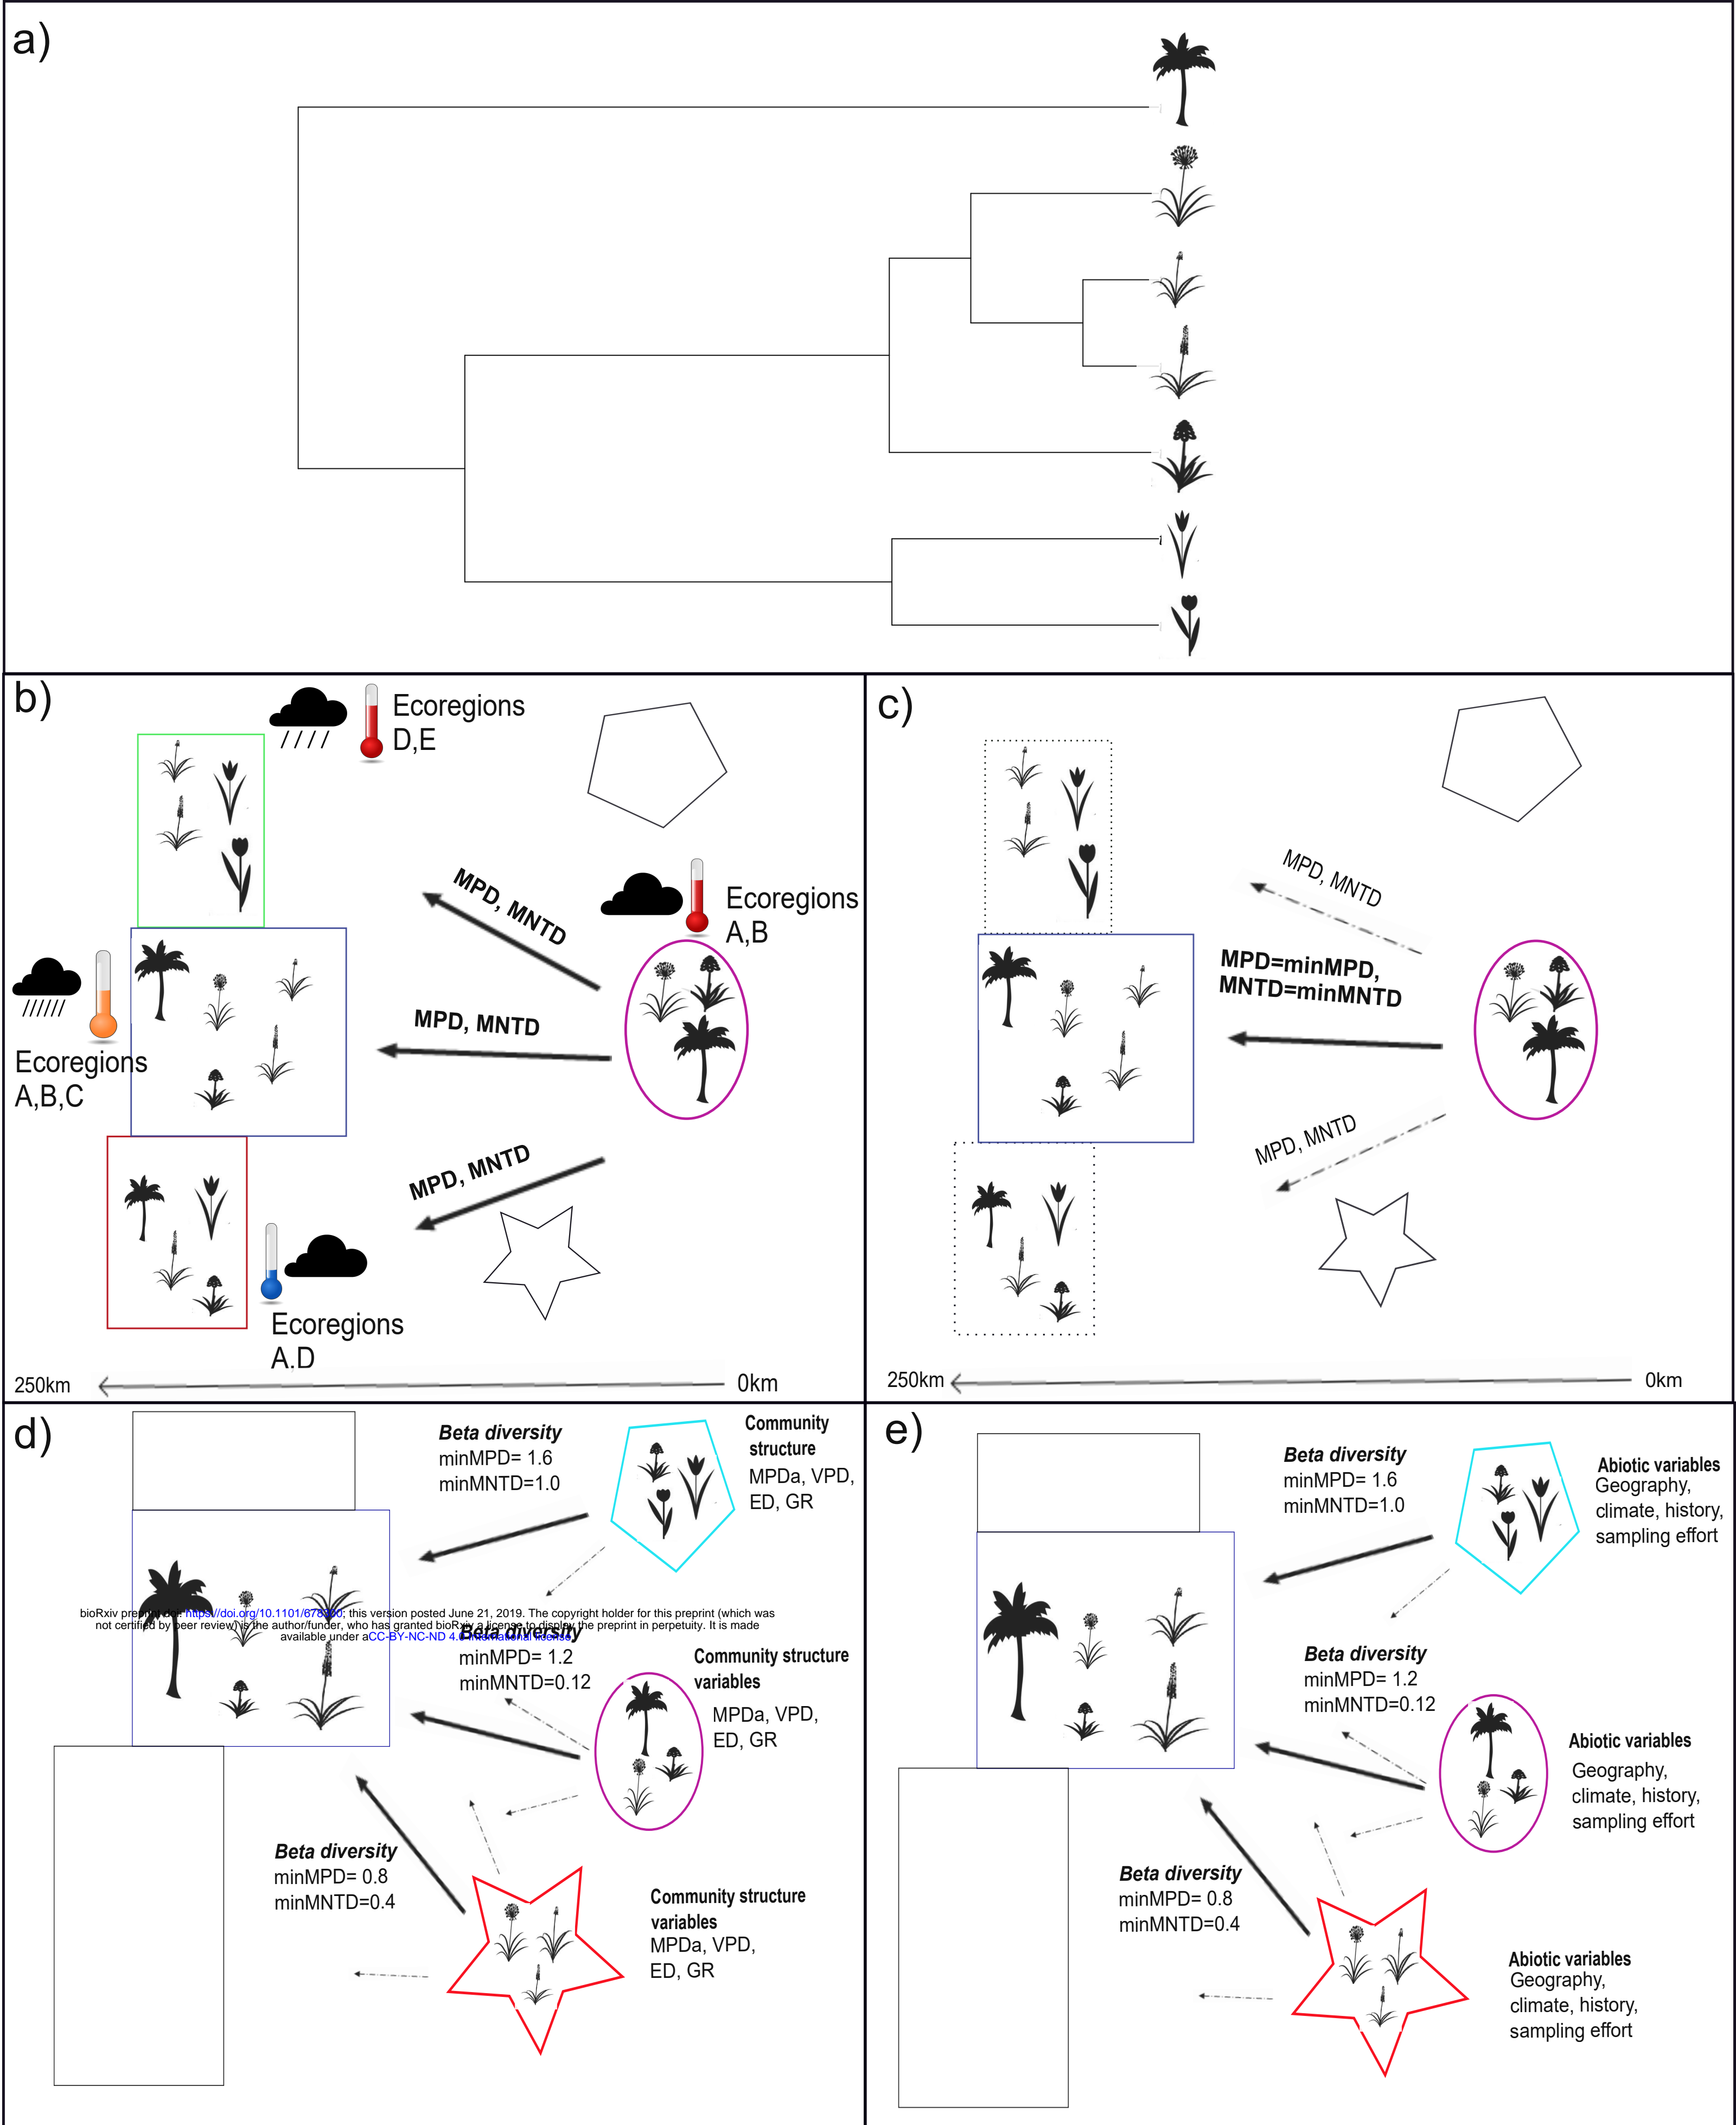

a) Figure of a phylogenetic tree

b) Beta diversity between an islands and the surrounding continents. MPD and MNTD were estimated from the 5, 10, 20 closest continental areas to each island as well as from all continents belonging to a similar biome as each island. Relationships between MPD and MNTD with spatial and environmental distances

c) Identification of minimum beta diversity values for each island and each index (MPDmin and MNTDmin).

d) Relationships minimum between beta diversity and community structure measures (see also table 2).

*MPDa*= alpha Mean pairwise Distance; *VPD*= Variance in Pairwise Distance

*ED*= Evolutionary Distinctiveness; *GR*= Genus Richness

e) Relationships between minimum beta diversity and abiotic factors (see also table 3)

a) minMPDbéta

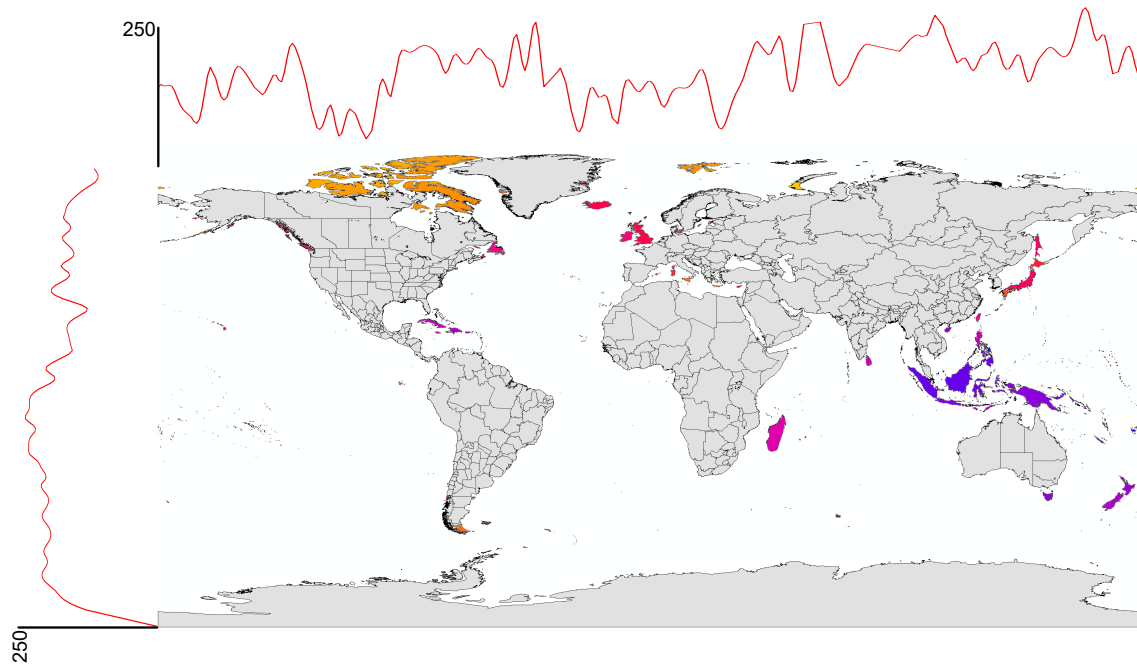

b) minMNTDbéta

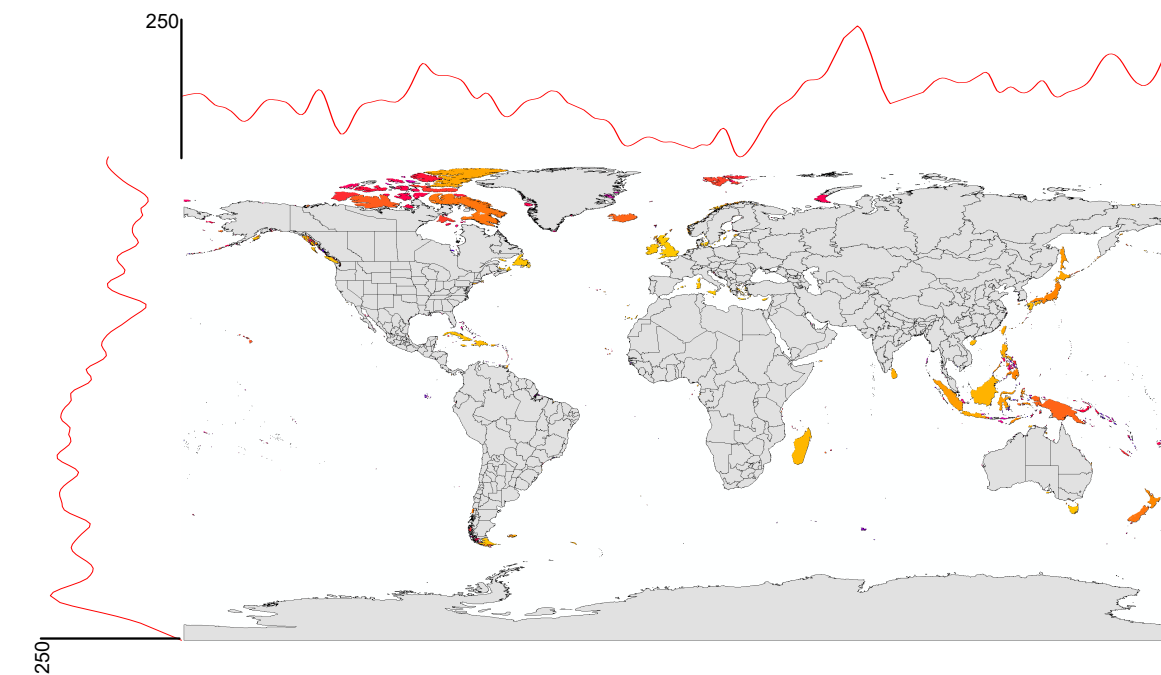

Phylogenetic divergence

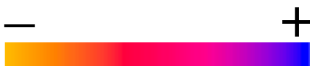

**Table 1:** The 15 abiotic variables tested and sources of data

| <i>Variable</i>                                         | <i>Unit</i>       | <i>Source</i>                                      |
|---------------------------------------------------------|-------------------|----------------------------------------------------|
| <b><i>Geographical variables</i></b>                    |                   |                                                    |
| <i>Latitude</i>                                         | Decimal degrees   | Depraetere & Dall (2007)                           |
| <i>Longitude</i>                                        | Decimal degrees   | Depraetere & Dall (2007)                           |
| <i>Minimum distance to continent</i>                    | km                | Depraetere & Dall (2007)                           |
| <i>Proportion of surrounding land mass (SLMP)</i>       |                   | Weigelt et al. (2013)                              |
| <i>Area</i>                                             | km <sup>2</sup>   | Depraetere & Dall (2007)                           |
| <i>Elevation</i>                                        | m                 | Weigelt et al. (2013),<br>Depraetere & Dall (2007) |
| <b><i>Climate</i></b>                                   |                   |                                                    |
| <i>Number of ecosystems</i>                             |                   | Olson et al. (2001)                                |
| <i>Mean annual temperature</i>                          | °C                | Fick & Hijmans, (2017)                             |
| <i>Mean annual rainfall</i>                             | mm                | Fick & Hijmans, (2017)                             |
| <i>Rainfall seasonality</i>                             | mm                | Fick & Hijmans, (2017)                             |
| <i>Mean annual wind speed</i>                           | m.s <sup>-1</sup> | Fick & Hijmans, (2017)                             |
| <i>Standard deviation of vapor pressure</i>             | kPa               | Fick & Hijmans, (2017)                             |
| <b><i>Historical factors</i></b>                        |                   |                                                    |
| <i>Connection to the mainland during the LGM (GMMC)</i> |                   | Weigelt et al. (2013)                              |
| <i>Velocity of past climate change</i>                  | y.m <sup>-1</sup> | Sandel et al. (2011)                               |
| <b><i>Sampling effort</i></b>                           |                   |                                                    |
| <i>ICE<sub>r</sub></i>                                  |                   | Lee & Chao (1994)                                  |

**Table 2:** Effects of spatial and environmental distance on  $MPD_{\beta}$  and  $MNTD_{\beta}$  between islands and continents measured from BRT and GLM: “\*\*\*\*” indicate  $Pr(>z) < 0.0001$ ; “\*\*\*” indicate  $Pr(>z) < 0.001$ ; “\*\*” indicate  $Pr(>z) < 0.01$ ; “.” indicate  $Pr(>z) < 0.1$ ; + and – indicate the direction of the relationship that is positive or negative, respectively. Column A presents the observed results. Column B and C represents data used as a sensitivity analysis.

**A. Oceanic islands**

|                                         | <i>A. 10 nearest continental areas</i> |                              | <i>B. 5 nearest continental areas</i> |                              | <i>C. 20 nearest continental areas</i> |                              |
|-----------------------------------------|----------------------------------------|------------------------------|---------------------------------------|------------------------------|----------------------------------------|------------------------------|
| <i>a) <math>MPD_{\beta}</math></i>      | Contribution estimated from BRT        | $Pr(>z)$ estimated from GLMM | Contribution estimated from BRT       | $Pr(>z)$ estimated from GLMM | Contribution estimated from BRT        | $Pr(>z)$ estimated from GLMM |
| <i>Spatial distance</i>                 | 15.4%                                  | +***                         | 12.8%                                 | +***                         | 16.2%                                  | +***                         |
| <i>Temp. difference</i>                 | 12.2%                                  | +                            | 12.7%                                 | +                            | 11.3%                                  | -***                         |
| <i>Rainfall difference</i>              | 19%                                    |                              | 17.6%                                 |                              | 22%                                    | +**                          |
| <i>Solar radiation difference</i>       | 28.4%                                  | -***                         | 32.3%                                 | -***                         | 23.5%                                  | -***                         |
| <i>Wind speed difference</i>            | 10%                                    | +***                         | 9.7%                                  | +***                         | 12%                                    | +**                          |
| <i>Euclidean environmental distance</i> | 9.7%                                   | +***                         | 8.2%                                  | +***                         | 10.4%                                  | +***                         |
| <i>Number of different ecoregions</i>   | 5.3%                                   | +***                         | 6.7%                                  | +***                         | 4.6%                                   | +***                         |
| <i>b) <math>MNTD_{\beta}</math></i>     |                                        |                              |                                       |                              |                                        |                              |
| <i>Spatial distance</i>                 | 23.8%                                  | +***                         | 24%                                   | +***                         | 20.8%                                  | +***                         |
| <i>Temp. difference</i>                 | 12.2%                                  | +***                         | 10.8%                                 | +***                         | 11%                                    | +***                         |
| <i>Rainfall difference</i>              | 15.4%                                  | +**                          | 15.6%                                 | +**                          | 13.3%                                  | +***                         |
| <i>Solar radiation difference</i>       | 17.5%                                  | +***                         | 20.6%                                 | +***                         | 15.6%                                  | +***                         |
| <i>Wind speed difference</i>            | 11.6%                                  | +***                         | 11.3%                                 | +***                         | 12.1%                                  | +***                         |
| <i>Euclidean environmental distance</i> | 13.9%                                  | +***                         | 11.7%                                 | +***                         | 22.7%                                  | +***                         |
| <i>Number of different ecoregions</i>   | 5.7%                                   | +***                         | 6%                                    | +***                         | 4.3%                                   | +***                         |

## B. Continental islands

|                                         | <i>A. 10 nearest continental areas</i> |                            | <i>B. 5 nearest continental areas</i> |                            | <i>C. 20 nearest continental areas</i> |                            |
|-----------------------------------------|----------------------------------------|----------------------------|---------------------------------------|----------------------------|----------------------------------------|----------------------------|
| <i>a) MPD<sub>β</sub></i>               | Contribution estimated from BRT        | Pr(>z) estimated from GLMM | Contribution estimated from BRT       | Pr(>z) estimated from GLMM | Contribution estimated from BRT        | Pr(>z) estimated from GLMM |
| <i>Spatial distance</i>                 | 13%                                    | +***                       | 12.7%                                 | +***                       | 13.6%                                  | +**                        |
| <i>Temp. difference</i>                 | 12.5%                                  | -                          | 13.6%                                 | +***                       | 12.6%                                  | +***                       |
| <i>Rainfall difference</i>              | 12.8%                                  | +***                       | 13%                                   | +*                         | 13.2%                                  | +***                       |
| <i>Solar radiation difference</i>       | 32%                                    | +                          | 31.1%                                 | -***                       | 29.5%                                  | -***                       |
| <i>Wind speed difference</i>            | 13.9%                                  | +***                       | 12.6%                                 | -***                       | 15.6%                                  | -*                         |
| <i>Euclidean environmental distance</i> | 9.3%                                   | +***                       | 11.1%                                 | +                          | 8.8%                                   | -***                       |
| <i>Number of different ecoregions</i>   | 6.5%                                   | +***                       | 5.9%                                  | +***                       | 6.8%                                   | +***                       |
| <b><i>b) MNTD<sub>β</sub></i></b>       |                                        |                            |                                       |                            |                                        |                            |
| <i>Spatial distance</i>                 | 10.8%                                  | +***                       | 10.6%                                 | +***                       | 9.7%                                   | +***                       |
| <i>Temp. difference</i>                 | 15.4%                                  | .                          | 14.3%                                 | +***                       | 16.4%                                  | +***                       |
| <i>Rainfall difference</i>              | 12%                                    |                            | 13.6%                                 | +***                       | 11.4%                                  | +***                       |
| <i>Solar radiation difference</i>       | 31.9%                                  | +***                       | 28.9%                                 | +***                       | 28.9%                                  | +***                       |
| <i>Wind speed difference</i>            | 10.5%                                  | +***                       | 10%                                   | +***                       | 10.4%                                  | +***                       |
| <i>Euclidean environmental distance</i> | 9.5%                                   | +***                       | 10.6%                                 | +***                       | 13%                                    | +***                       |
| <i>Number of different ecoregions</i>   | 9.8%                                   | +***                       | 11.8%                                 | +***                       | 10.2%                                  | +***                       |

**Table 3:** Contribution, direction and significance of variables of phylogenetic structure to minimum  $MPD_{\beta}$  and  $MNTD_{\beta}$  between islands and continents.

|                                      | <i>Contribution</i> | <i>Estimate</i> | <i>Standard error</i> | <i>Pr(&gt;z)</i> |
|--------------------------------------|---------------------|-----------------|-----------------------|------------------|
| <b>A. <i>minMPD<sub>β</sub></i></b>  |                     |                 |                       |                  |
| <i>MPD<sub>α</sub></i>               | 31.8% (2/7)         | 6.2             | 0.55                  | ***              |
| <i>Mean ED</i>                       | 43.6% (1/7)         | 15.1            | 0.73                  | ***              |
| <i>Sd ED</i>                         | 14.4% (3/7)         | 7.9             | 0.47                  | ***              |
| <i>Nb top 10 ED species</i>          | 0.22% (7/7)         | -0.63           | 0.43                  |                  |
| <i>Proportion of top ED species</i>  | 1.36% (6/7)         | 11.2            | 0.97                  | ***              |
| <i>VPD</i>                           | 6.3% (4/7)          | -1.94           | 0.37                  | ***              |
| <i>Genus richness</i>                | 2.1% (5/7)          | 2.6             | 0.41                  | ***              |
| <b>B. <i>minMNTD<sub>β</sub></i></b> |                     |                 |                       |                  |
| <i>MPD<sub>α</sub></i>               | 15.04% (3/7)        | -0.17           | 0.0034                | ***              |
| <i>Mean ED</i>                       | 9.3% (4/7)          | 0.22            | 0.0044                | ***              |
| <i>Sd ED</i>                         | 3.1% (5/7)          | -0.14           | 0.007                 | ***              |
| <i>Nb top10 ED species</i>           | 0.005% (7/7)        | 0.23            | 0.0039                | ***              |
| <i>Proportion of top ED species</i>  | 0.07% (6/7)         | -0.034          | 0.066                 | ***              |
| <i>VPD</i>                           | 30.6% (2/7)         | -0.006          | 0.002                 | ***              |
| <i>Genus richness</i>                | 42.3% (1/7)         | -0.60           | 0.0048                | ***              |



**Table 4.** Contribution, direction and significance of abiotic variables to A) minimum  $MPD_{\beta}$  between islands and continents and B) minimum  $MNTD_{\beta}$  between islands and continents.

A.  $minMPD_{\beta}$

|                                 |                                          | <i>Contribution to<br/><math>minMPD_{\beta}</math></i> | <i>Estimate</i> | <i>Standard<br/>error</i> | <i>Pr(&gt;z)</i> |
|---------------------------------|------------------------------------------|--------------------------------------------------------|-----------------|---------------------------|------------------|
| <i>Geographic<br/>variables</i> | Area                                     | 1.6% (11/15)                                           | -1.2            | 0.58                      | *                |
|                                 | SLMP                                     | 1.5% (12/15)                                           | 1.1             | 0.86                      |                  |
|                                 | Elevation                                | 0.9% (13/15)                                           | -0.17           | 0.68                      |                  |
|                                 | Minimum distance to<br>continents        | 5.8% (8/15)                                            | 1.2             | 0.54                      | *                |
|                                 | Latitude                                 | 35.5% (1/15)                                           | -7.9            | 0.87                      | ***              |
|                                 | Longitude                                | 9.8% (3/15)                                            | 0.17            | 0.55                      |                  |
| <i>Climatic<br/>variables</i>   | Number of ecosystems                     | 0.2% (15/15)                                           | 1.8             | 0.56                      | **               |
|                                 | Mean annual temperature                  | 9.1% (4/15)                                            | 7.3             | 0.94                      | ***              |
|                                 | Mean annual rainfall                     | 10.7% (2/15)                                           | 5.06            | 0.68                      | ***              |
|                                 | Rainfall seasonality                     | 7.7% (5/15)                                            | -6.3            | 0.65                      | ***              |
|                                 | Mean annual wind speed                   | 6.3% (6/15)                                            | -5.0            | 0.75                      | ***              |
|                                 | Standard deviation in vapour<br>pressure | 5.9% (7/15)                                            | -3.6            | 0.63                      | ***              |
| <i>Historical<br/>variables</i> | Velocity of past climate<br>change       | 4.5% (9/15)                                            | 4.9             | 0.72                      | ***              |
|                                 | GMMC                                     | 0.2% (14/15)                                           | 7.7             | 1.62                      | ***              |
| <i>Sampling effort</i>          | ICER                                     | 1.7% (10/15)                                           | -0.31           | 0.48                      |                  |
| <i>Interactions</i>             | Latitude:Longitude                       |                                                        | -6.5            | 0.53                      | ***              |
|                                 | Longitude:Temperature                    |                                                        | 2.6             | 0.54                      | ***              |

B.  $minMNTD_{\beta}$

|                                 |           | <i>Contribution to<br/><math>minMNTD_{\beta}</math></i> | <i>Estimate</i> | <i>Standard<br/>error</i> | <i>Pr(&gt;z)</i> |
|---------------------------------|-----------|---------------------------------------------------------|-----------------|---------------------------|------------------|
| <i>Geographic<br/>variables</i> | Area      | 4.3% (6/15)                                             | 0.034           | 0.003                     | ***              |
|                                 | SLMP      | 2.6% (9/15)                                             | -0.098          | 0.004                     | ***              |
|                                 | Elevation | 1.6% (13/15)                                            | -0.12           | 0.0039                    | ***              |

|                             |                                       |               |        |        |     |
|-----------------------------|---------------------------------------|---------------|--------|--------|-----|
|                             | Minimum distance to continent         | 1.8% (10/15)  | 0.045  | 0.0032 | *** |
|                             | Latitude                              | 31.1% (1/15)  | -0.22  | 0.004  | *** |
|                             | Longitude                             | 9.7% (3/15)   | -0.07  | 0.0029 | *** |
| <i>Climatic variables</i>   | Number of ecosystems                  | 0.8% (14/15)  | -0.063 | 0.0037 | *** |
|                             | Mean annual temperature               | 4.3% (5/15)   | 0.017  | 0.0049 | *** |
|                             | Mean annual rainfall                  | 3.1% (7/15)   | 0.066  | 0.0033 | *** |
|                             | Rainfall seasonality                  | 1.7% (11/15)  | 0.037  | 0.0035 | *** |
|                             | Mean annual wind speed                | 1.6% (12/15)  | -0.08  | 0.0039 | *** |
|                             | Standard deviation in vapour pressure | 7.0% (4/15)   | -0.004 | 0.00é  | .   |
| <i>Historical variables</i> | Velocity of past climate change       | 2.7% (8/15)   | 0.07   | 0.0036 | *** |
|                             | GMMC                                  | 0.03% (15/15) | -0.058 | 0.009  | *** |
| <i>Sampling effort</i>      | ICEr                                  | 26.7% (2/15)  | -0.10  | 0.0031 | *** |
| <i>Interactions</i>         | Latitude:Longitude                    |               | -0.14  | 0.0023 | *** |
|                             | ICE:Area                              |               | -0.036 | 0.0027 | *** |
